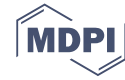

Review

# Why human papillomavirus acute infections matter

Samuel Alizon<sup>1,\*</sup> , Carmen Lía Murall<sup>1</sup>  and Ignacio G. Bravo<sup>1</sup> 

<sup>1</sup> MIVEGEC (UMR CNRS 5290, UR IRD 224, UM), 911 avenue Agropolis, 34394 Montpellier Cedex 5, France

\* Correspondence: samuel.alizon@cnrs.fr; Tel.: +33.4.48.19.18.67

Academic Editor: Alison McBride and Karl Munger

Version September 25, 2017 submitted to *Viruses*

**Abstract:** Most infections by human papillomaviruses (HPVs) are ‘acute’, that is non-persistent. Yet, for HPVs, as for many other oncoviruses, there is a striking gap between our detailed understanding of chronic infections and our limited data on the early stages of infection. Here we argue that studying HPV acute infections is necessary and timely. Focusing on early interactions will help explain why certain infections are cleared while others become chronic or latent. From a molecular perspective, descriptions of immune effectors and pro-inflammatory pathways during the initial stages of infections have the potential to lead to novel treatments or to improved handling algorithms. From a dynamical perspective, adopting concepts from spatial ecology, such as meta-populations or meta-communities, can help explain why HPV acute infections sometimes last for years. Furthermore, cervical cancer screening and vaccines impose novel iatrogenic pressures on HPVs, implying that anticipating any viral evolutionary response remain essential. Finally, hints at the associations between HPV acute infections and fertility deserve further investigation given their high worldwide prevalence. Overall, understanding asymptomatic and benign infections may be instrumental in reducing HPV virulence.

**Keywords:** clearance; persistence; latency; chronic; meta-population; fertility; virome; warts; cancer; evolution; ecology; vaccination

The most oncogenic viruses to humans are a group of around 20, closely related, Human papillomavirus (HPV) types. All of them are classified in the alpha-papillomaviruses genus and classically referred to as ‘high risk types’ [1]. HPV-induced cancers typically occur after several years of infection (Figure 1). The importance of viral persistence in the natural history of these cancers has driven most research to focus on chronic infections and to relatively neglect acute infections (*sensu* Virgin *et alii* [2]). For instance, when studying the duration of HPV infections in young women, infections that clear within two to three years tend to be referred to only indirectly, i.e. without a qualifying adjective [3]. Here we aim at clarifying what acute HPV infections are and to summarize the current understanding about them, in the context of the recent progress in the fight against HPVs. Finally, we identify the main gaps in our knowledge about such acute infections, which, if filled, would have direct implications for preventing, controlling and treating infections by HPVs.

## State of the fight against HPVs

Infection-driven cancers are distinctive because they can be fought using the arsenal developed against infectious diseases: identification of risk factors, prevention of transmission and early detection of infected individuals. Identification of risk factors has led to the recognition of a few, closely related oncogenic HPVs as necessary etiologic agents of several cancers [5]. Contagion can now be prevented by the use of safe and effective vaccines targeting the most oncogenic HPVs along with certain non-oncogenic HPVs that cause anogenital warts [6,7]. Screening programs for early detection of (pre)neoplastic lesions caused by HPVs infections have also been successful at decreasing the burden

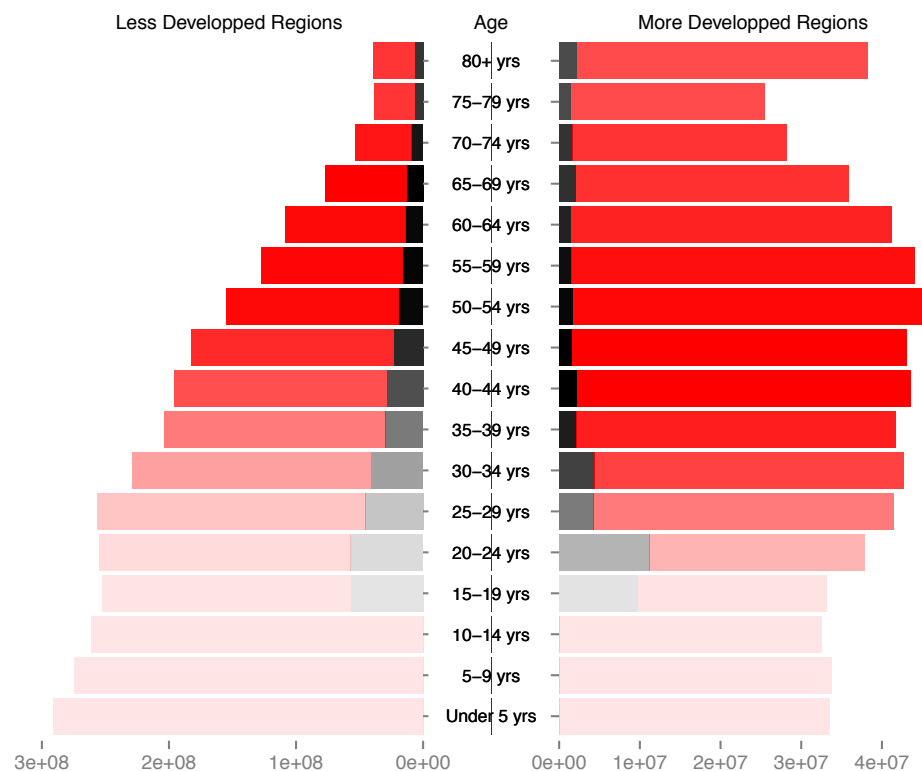

**Figure 1. Number of women with asymptomatic cervical HPV infections (black bars) as a function of age class (red bars) and of country development status.** Bar color intensity reflects the prevalence of cervical cancer in the corresponding age class (and hence the focus of current research). Data should be read as follows, using the 30-34 years of age as an example: in less developed regions, among the 228 million women in the age class, 40 million (17,8%) display a normal cytology but are actually infected by HPVs, and 30 thousand (0,013%) suffer from cervical cancer, while in more developed regions among the 42 million women in the age class, 4.3 million (10,2%) display a normal cytology but are actually infected by HPVs, and 6 thousand (0,015%) suffer from cervical cancer. Data correspond to HPV prevalence in women with normal cytology, as estimated in the HPV information center (<http://hpvcentre.net/>, [4]). Overall HPV prevalence values will be actually larger, as they will include women with abnormal cytology. No data were available for HPV prevalence in women below 15 years of age. Demographic data correspond to the UN projections for 2015 (note the shift in the logarithmic scale for the left and the right sides).

36 of cervical cancer in rich countries [8]. However, their differential implementation has also increased  
37 the inequality between countries [9,10].

38 In spite of primary and secondary prevention measurements available, HPVs will continue to  
39 infect millions of people in the foreseeable future, thereby causing significant morbidity and mortality  
40 worldwide [11]. Indeed, vaccine coverage varies widely both within and between countries [6], as  
41 does access to screening programs [12]. Beyond socio-economical factors, screening effectiveness is  
42 hampered by the fact that certain forms of cancer are more difficult to detect than others. This is the  
43 case for glandular forms of cervical cancer compared to the more common squamous carcinoma. They  
44 are often overlooked during standard screening procedures and their incidence is increasing [13,14].  
45 Furthermore, cancers induced by HPVs in anatomical locations other than the cervix (e.g. anal [15]  
46 or oropharyngeal [16]) are on the rise in many countries, albeit in different populations [5]. These  
47 cancers are particularly worrying: either because they are detected once the carcinogenic process is  
48 more advanced, as is the case of head and neck cancer [16], or because they affect populations at

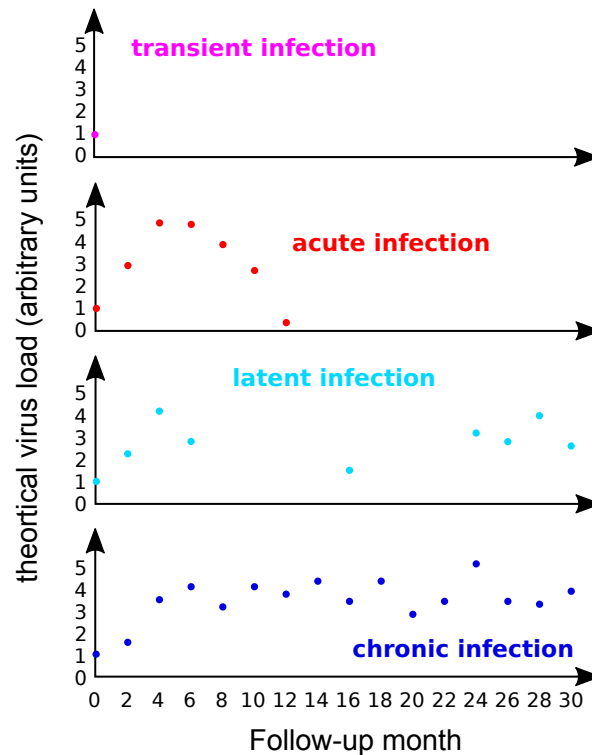

**Figure 2. Kinetics of HPV virus load in different genital infections.** The panels present made-up data with four imaginary patients monitored every 2 months from the onset of the infection (month 0). Currently most data describe viral load in precancerous lesions and in cancers [23], while very little data focus on how virus loads vary over the course of an acute infection.

49 increased risk, as is the case of anal cancer in HIV-infected men having sex with men [15]. Finally, from  
50 an economical perspective, non-carcinogenic HPVs should not be overlooked since the total health  
51 care cost linked to treating genital warts can exceed that of treating HPV-induced cancers [17], despite  
52 the obvious differences in severity and indirect impact of both diseases.

### 53 HPV acute infections

#### 54 *A definition challenge*

55 HPV infections that are not chronic or latent have been referred to as ‘acute’ [18,19],  
56 ‘non-persistent’ [20], ‘transient’ [21], or ‘cleared’ [22] infections. Here, following Virgin *et al.* [2],  
57 we define acute infections as a non-equilibrium process that results either in infection clearance, host  
58 death or chronic infection.

59 As illustrated in Figure 2, clinical detection patterns may often lead to ambiguities. First, after  
60 sexual intercourse with an infected partner, viral genetic material may be detected for several days,  
61 even in the absence of an infection. We refer to these as ‘transitory infections’, although ‘transitory  
62 detection’ might be more accurate. Second, some infections successfully establish, replicate the viral  
63 genome, produce virions, and are eventually cleared (Figure 2). We refer to these as ‘acute infections’.  
64 Third, some acute infections only appear to clear, but the viral genome remains in the infected cell  
65 without detectable activity [18,24]. We refer to these as ‘latent infections’. The viral genetic material  
66 may occasionally be detected during latency. Reactivation of the viral activity in latent infections  
67 may occur much later, for instance triggered by immunosuppression [25], but often also without any  
68 obvious reason. Finally, some acute infections are not cleared and maintain viral activity over time. We  
69 refer to these as ‘chronic infections’. Clinically relevant chronic infections may still resolve naturally,

70 sometimes in a matter of years [8,21]. Acute, latent and chronic infections most likely differ in terms  
71 of viral activity, e.g. viral and cellular gene expression patterns, effects on cell replication dynamics  
72 or induced local immunosuppression [26]. Nevertheless, in the absence of a proper follow-up study  
73 design, characterising the stage of an infection remains difficult, as the detection of viral genetic  
74 material associated to latent or to chronic infections [2] can bias our estimates about the prevalence of  
75 acute infections, as explained below.

76 One important reason for the blurry line between acute and chronic infections is that HPVs are  
77 very diverse in terms of genetics as well as in clinical presentation of the infection. For instance,  
78 papillomaviruses colonise the skin and mucosa of virtually all humans from very early in life [27–29]  
79 and replicate at very low levels without any apparent clinical or cellular damage. In this respect,  
80 humans are continuously being infected (and reinfected) by HPVs, and most humans host a number  
81 of latent or chronic infections by HPVs. Certain viral genotypes cause proliferative infections with  
82 clinical manifestations such as warts or pre-neoplastic lesions. As we will see below, most of these  
83 proliferative lesions resolve naturally albeit in a matter of years, meaning that acute infections by HPVs  
84 can be of long duration. Overall, only a detailed understanding of the role of the immune response  
85 and clearance, of the nature and permissiveness for latency/chronicity of the cellular targets, and of  
86 the timing and repertoire of viral gene expression, will allow us to clarify the frontier between acute  
87 and chronic HPV infections.

#### 88 *Most infections by HPVs are acute*

89 For most viruses the acute, clinically prominent phases of viral infections, are generally better  
90 understood than the chronic ones [2]. Research on oncogenic HPVs is an exception because of its focus  
91 on chronicity and on virus-induced cell transformation. Nevertheless, epidemiology data strongly  
92 suggest that the vast majority of anogenital infections by oncogenic HPVs never become chronic [8]. In  
93 women, the incidence of novel anogenital infections by oncogenic HPVs decreases with age, while  
94 persistence increases with age [30,31]. In men, this risk for novel infections is stable with age [32].  
95 For infections in the female genital tract, the prevalence is U-shaped with age [4,33]. For both, men  
96 and women, young adults exhibit the highest prevalence, which often rises above 25% (black bars in  
97 Figure 1). HPV16 is the most persistent type, but by 12 months 40% of infections clear or are treated  
98 because of diagnosis of a (pre)neoplastic lesion (Figure 3). This proportion reaches 85% by 36 months  
99 [3]. For HPV6, which is only very rarely associated with cancer [34] and instead most often with  
100 genital warts, these numbers are 66% and 98% respectively. These figures should nevertheless be taken  
101 with caution, as they directly depend on our ability to detect latent infections [18,24].

102 Besides studies on the natural history of the infection, the placebo arms of vaccine trials have been  
103 instrumental in increasing our understanding of the epidemiology of these infections by following  
104 thousands of young adults over time [e.g. 35–37]. In order to detect viral persistence of anogenital  
105 infections, the typical interval between two visits is usually six months. Studies with denser sampling  
106 (e.g. twice per week, as in [38]) often come at the expense of duration of the follow-up (16 weeks in  
107 this case), and therefore may provide accurate information about incidence but less information about  
108 persistence.

109 Some longitudinal studies performed more frequent sampling over a long period of time. For  
110 instance, two studies sampled women every 3 months. One of these followed unvaccinated girls  
111 aged 15–16 years in Tanzania and found that the median time from reported sexual debut to first  
112 HPV infection was five months, while median infection duration was six months [22]. Another study  
113 followed 150 adolescent women (aged 14 to 17) visiting primary care clinics for a median of six years  
114 [39], and found that 21% of HPV type-specific infections consisted of re-detection after apparent  
115 clearance (two negative visits). Note, however, that these girls were simultaneously infected by  
116 many HPVs, which could have generated some interference in the detection with the technique used.  
117 Furthermore, the population studied exhibited high rates of sexually transmitted infections (71.2% for  
118 chlamydia and 49.3% for gonorrhoea) and a mean of above 10 sexual partners during the study. In spite

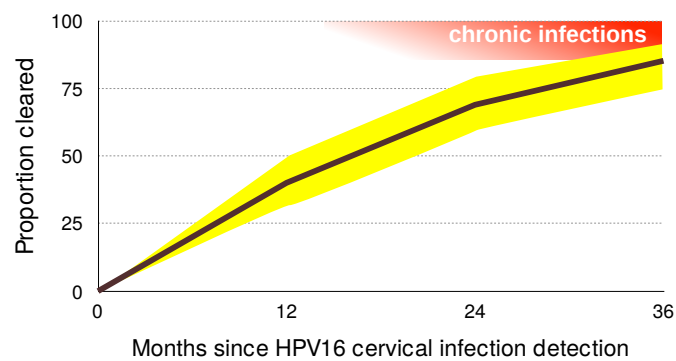

**Figure 3. Proportion of HPV16 infections cleared 12, 24 and 36 months after the first detection.** 95% confidence intervals are shown in yellow. Acute infections result in clearance or chronic infections, shown in red (note that chronic infections may clear as well). Data on clearance proportions originate from Table 4 in [3] and were obtained for 895 women in the United States of America, aged 16 to 23. Notice that chronic infections (in red) can also clear.

119 of their limitations, these two studies suggest that the little we know about the duration and the actual  
120 clearance of acute infections could be challenged by studies with deeper resolution.

### 121 *The immunology of clearance*

122 Why most infections clear, while only few persist and progress to cancer remains largely  
123 unresolved (see Box 1 at the end of this article). Overall, we know that some cofactors such as  
124 HPV genotype, host genetic background, age of sexual debut, or coinfections, have an effect on  
125 clearance time [40]. However, our mechanistic understanding is still lagging behind.

126 The immunology of HPV infections has been thoroughly reviewed elsewhere [e.g. 41]. We know  
127 that HPV infections concur with a local anti-inflammatory environment, and that although the adaptive  
128 immune response is very efficient at clearing the infection, its activation is variable and sometimes  
129 insufficient to prevent future re-infections [36,41,42].

130 Recent research into the role of innate effectors (e.g. natural killer T cells) and Th-17 responses  
131 (e.g.  $\delta\gamma$  T cells) in cancerous lesions has provided new insights into chronic infections [43], but the  
132 implications for acute infection clearance is not obvious. More work, then, into innate and adaptive  
133 immunity activities during acute infections would help better elucidate mechanisms of clearance, as  
134 they are likely to be several. This is particularly true for non-cervical body sites, where the specific  
135 immunity microenvironment is less understood.

### 136 **Open challenges**

#### 137 *Deciphering HPV kinetics: the meta-population hypothesis*

138 The extant genetic diversity of HPVs is enormous, with many different viral life styles. For  
139 anogenital infections alone, there is a large variance in infection duration, with values ranging from a  
140 few months [22] to years [3]. We propose here that the meta-population framework used in ecology  
141 can provide strong explanatory power and insight into this variance.

142 In ecology, a meta-population is a set of populations of the same species that are connected  
143 through dispersal [44,45]. Each population displays its own dynamics but the processes and patterns  
144 that emerge at a higher (meta-population) level can be very different from what happens within each  
145 population. This ecological framework has relevance for host-pathogen interactions. For instance,  
146 genetic data suggests that HIV infections may exhibit a meta-population structure in the spleen

147 [46]. Also, within-host viral genetic structure such as this has been recently put forward as an  
148 underlying explanation for the great variance in set-point viral load observed between patients [47].  
149 A meta-population framework was first proposed and applied to HPVs in a study of multiple type  
150 infections under natural and vaccinated immunological scenarios [48]. Here, we broaden this as a way  
151 to understand the variation in dynamics of HPV infections.

152 The modular nature of mammalian skin and the individual proliferation of cells set the scene for  
153 a meta-population scenario, one where discrete viral populations can establish in various ‘patches’  
154 within the same anatomical ‘site’ and/or in various sites of the same host. We further argue that this  
155 framework can help explain the thin line between acute and chronic HPV infections.

156 Viral colonisation of an individual patch is largely a rare event, provided that the common  
157 assumption of access to basal cells through microlesions holds true. The ability of the virus to access  
158 other patches increases with infection duration, virion productivity and weakening of epithelium  
159 integrity. Following Ryser *et al.* [49], we argue that local extinction/success are stochastic processes.  
160 Some initially infected patches may not successfully infect a new patch before going extinct, while  
161 others might. To further complicate the picture, heterogeneity of cell types and skin structures leads  
162 to patch differences in susceptibility to infection, in permissivity to virion production, or in intensity  
163 of immune surveillance. Thus, certain patches will act as reservoirs (known as ‘source patches’ in  
164 ecology) while others will act as ‘sink patches’. In such source-sink dynamics, infection duration  
165 is driven by the extinction rate in the reservoir patches but the virus load detected depends on the  
166 number and productivity of the sink patches infected as well [47].

167 Regarding infection duration, the meta-population hypothesis allows to differentiate between  
168 genuine and apparent chronic infections. Genuinely chronic infections would refer to sustained and  
169 characteristic viral activity in a given patch for a long period of time, therefore allowing for the  
170 accumulation of molecular damage that may lead to malignisation [50,51]. Apparent chronic infections  
171 would be sequential transmission chains of infections from one patch to another within the same  
172 anatomical location (Figure 4). In this case, each individual patch infection may eventually die out, so  
173 that there is no sustained virus-cell interaction, even if the patient remains positive for the infection by  
174 the same viral type during a long time. Obviously, the repetitive infection events in these apparent  
175 chronic infections would increase the chances that one of them becomes genuinely chronic, if the  
176 virus-cell-environment interactions allow for it.

177 The meta-population framework, thus, may provide a powerful ecological explanation for the  
178 poorly understood differential progression of certain chronic infections towards cancer. Also, viral  
179 and cellular genomes will not accumulate similar genetic and/or epigenetic modifications during  
180 genuine and apparent chronic infections, thus allowing for molecular tests to differentiate between  
181 them. Testing the meta-population hypothesis will require HPV research to engage in spatial ecology  
182 studies, sampling between various macro/microscopic sites within the same individual (e.g. [52–55]),  
183 to study ‘auto-inoculation’ [56] and to systematically resort to microdissection studies to investigate  
184 the details of infected patches within sites [34,57–59].

### 185 *Cellular, viral and environmental heterogeneity: towards meta-communities*

186 The mammalian skin is a complex environment with an intricate tri-dimensional structure. The  
187 most distinctive feature is the presence of hairs and the expression of keratins, keratin-associated  
188 proteins, the epidermal differentiation complex [60–62], as well as other hair evolutionary-related  
189 structures such as the mammary, sebaceous and sweat glands [63]. Different sites of the body have  
190 specific cell types, with unique composition, arrangement and density of skin appendages. Particular  
191 anatomical features are often observed at transitions between specialised epithelia, as in the tonsillar  
192 crypta, the transition zone in the cervix, the perianal region or the periungual area. Stratified skin  
193 renewal dynamics are strongly regulated and proceed vertically, with a gradient from the dividing  
194 cells in the basal layer to the differentiating and cornified keratinocytes in the outermost layer. The skin  
195 structure is, thus, conceivably modular, with columnar functional ‘patches’, which we will define here

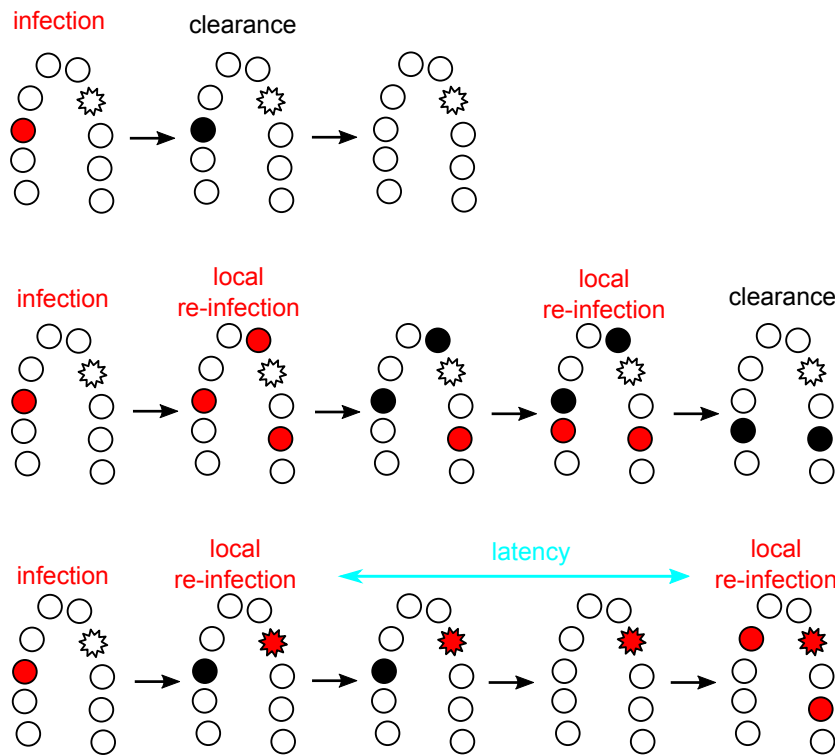

**Figure 4. The meta-population hypothesis for HPV kinetics, exemplified in the cervix.** Each circle represents a population (i.e. a cellular patch or a site) that can be susceptible (white), infected (red) or recovered from infection (black). The star-shape indicates a cellular patch that can remain infected for a longer time than the regular sites, and can that act as a source site if infected. For simplicity, recovered sites are here assumed to transiently exhibit higher local immunity and resource depletion, thus making it unsustainable for re-infection. The top line shows a case with a local acute infection that is cleared without reaching other patches. The middle one shows a meta-population dynamics of local re-infection from an initial patch, without cell heterogeneity. The bottom line shows a case with patch heterogeneity (source-sink dynamics).

196 as the continuum of locations in the epithelium. The ‘vertical’ nature of the proliferating/desquamating  
 197 keratinocyte patches is complemented by the ‘horizontal’ immune surveillance by Langerhans cells,  
 198 dendritic cells and macrophages [64,65].

199 This heterogeneity goes beyond the strong assumption of the meta-population concept, which  
 200 is that it only applies to populations, that is individuals from the same species. To account for  
 201 different target cell types and for more ‘trophic interactions’ (here immune cells), we need to invoke  
 202 the meta-community concept [66]. This has already proven to be appropriate to analyse within-host  
 203 dynamics, because various parasite species often coinfect the same host, thus compete for space, energy,  
 204 and resources [67,68].

205 A first advantage of an HPV meta-community approach is that it can factor in different target cell  
 206 types. Papillomaviruses have been infecting amniotes since their first appearance [69] and have evolved  
 207 strategies to successfully thrive across the diversity of structures and specialisations of present-day  
 208 mammalian skin [70]. For instance, cells in hair follicles seem to act as reservoirs for chronic infection  
 209 by cutaneous HPVs, while in stratified mucosal epithelia viral infections can become chronic in the  
 210 basal cell layer. The columnar nature of the skin influences the natural history of the proliferative  
 211 lesions induced by HPVs, which derive from the clonal expansion of basal/parabasal cells [70,71].

212 The heterogeneous nature of the skin underlies also the different propensity for chronic viral  
 213 infections to lead to cancer in different anatomical locations. Many squamous cervical carcinomas  
 214 associated with HPVs are thought to arise from a discrete population of cuboidal epithelial cells

215 located in the transformation zone between the endo- and the ectocervix [72]. The absence of such  
216 transformation zones in the vagina, vulva or penis might explain why the cervix has a much higher  
217 burden of infection, higher incidence and younger age-at-diagnosis for cancers compared to other  
218 anatomical locations [73]. We can only speculate on why HPV-related cancers also occur in absence of  
219 a transformation zone, but a likely explanation is that all infected epithelial stem cells can potentially  
220 end up being carcinogenic but that the probability of such event depends on the cell phenotype and  
221 the local environment. Finally, heterogeneity between squamous and glandular patches results also  
222 in differential susceptibility towards chronification and malignisation by different HPVs and even  
223 by closely related viral variants, possibly also modulated by the host genetic background [74]. These  
224 known effects of cellular heterogeneity on chronic infections and cancer are likely to also affect acute  
225 infections but our knowledge about the latter is very limited.

226 More generally, the underlying hypothesis in our meta-population and meta-community  
227 approaches is that acute, latent and chronic infections exhibit differential specific features at the  
228 virocellular level, which further vary as a function of the infected cell type and differentiation status.  
229 Markers of acute *versus* true persisting infections will most likely be different for different anatomical  
230 sites and skin structures. The overall dynamics of the virus-host interaction is thus an integration of  
231 the interactions between viral genotype, host genotype, cellular phenotype and environment.

### 232 *HPV latency*

233 Papillomavirus latent infections are still very poorly characterised and understood. The  
234 prevalence of latency remains largely unexplored, and its contribution to the oncogenic process  
235 in chronic infections is obscure. Establishment of latent infections is a life-history trait shared by very  
236 divergent viruses. For large DNA viruses, such as herpesviruses, the infection often starts with an  
237 acute phase, and then viral gene expression changes towards a different profile where the virus enters  
238 a latent state, with limited or even no genome replication, and no cellular damage, until reactivation is  
239 triggered. In small DNA viruses, such as Torque-Teno viruses, the initial infection goes unnoticed (the  
240 acute infection stage has actually never been documented) and the viral genomes remain in the host  
241 and replicate chronically at very low levels without apparent damage [2]. For papillomaviruses, most  
242 of the evidence on latency originates from animal models, where latency is defined as low-level viral  
243 genome maintenance in the basal layers without a productive viral life cycle [25,75].

244 For HPVs, two ways for latency to arise have been proposed: infections may directly enter  
245 latency without going through an acute phase, or it may instead arise after a productive phase without  
246 successful clearance [24]. In both cases, latency is directly linked to acute infection dynamics. In the  
247 meta-communities context, latency can additionally be conceived to arise from heterogeneity in the  
248 interactions between virus and host cells. The molecular decision for cell division in the basal layer is  
249 stochastic and given that the viral genome requires cell division to replicate [76], latency-reactivation  
250 episodes could be mechanistically understood to reflect stochasticity in the time lapses of basal cell  
251 mitotic activity, without necessarily requiring viral manipulation of the host cell. Again, anatomical  
252 heterogeneity and viral genetic diversity may render certain anatomical locations combined with  
253 particular viral lineages more prone to such latency-reactivation cycles. Overall, in addition to molecular  
254 virology investigations into latency mechanisms, studies combining a detailed initial follow-up (to  
255 demonstrate clearance), a long follow-up (to demonstrate chronic infection) and sequencing (to  
256 demonstrate that the virus causing the acute infection actually persisted) will help generate a complete  
257 picture on papillomavirus infection latency.

### 258 *Immunotherapies*

259 Since vaccination will not be widespread for many years [77] and given that treatment  
260 interventions are often expensive and difficult to implement, the development of treatments  
261 remains urgent. Treatment development remains historically the less successful front for HPV  
262 research. Understanding the mechanisms of HPV clearance promises aiding the development of



263 immunotherapies, which consist in treating a disease by stimulating or suppressing the immune  
264 system.

265 Currently, the bulk of clinical and animal model research into HPV immunotherapies is  
266 understandably focused on cervical cancer treatment. Indeed, there are numerous approaches to  
267 developing these treatments, such as protein/peptide vaccines, bacteria-and-viral based vectors, and  
268 immunomodulators [78]. One of the most promising examples to date is the therapeutic vaccine  
269 VGX-3100, a plasmid containing synthetic versions of *E6* and *E7* genes of HPV16 and HPV18, which  
270 showed efficiency in a controlled trial at improving the regression of high-grade lesions (CIN2/3) [79].  
271 The iatrogenic exposure to viral oncoproteins triggers a strong cellular immune response against the  
272 infected cells that the natural infection is not able to initiate. An alternative approach is to reverse  
273 the anti-inflammatory microenvironment that the virus creates during infections, in order to alert the  
274 immune system and boost its functioning [reviewed in 80]. While several of these therapies have  
275 reached clinical trial stages, it has become clear that one mechanism alone (e.g. augmenting CTL  
276 infiltration and function) will not suffice, and combinations of mechanisms are needed. Studying how  
277 these mechanisms work in natural acute infections might help.

278 In practice, immunotherapies cannot be envisaged to treat all acute HPV infections given their  
279 prevalence and their often sub-clinical presentations. However, knowledge on the acute stage could be  
280 transferable to fight chronic stage infections. For instance by identifying any immune stimulants or  
281 immune cell subtypes that help clear natural acute infections. However, it may be possible that several  
282 treatments will be needed for different lesion grades (e.g. for low to high-grade neoplastic lesions than  
283 for late-stage cancers), given that the heightened immune suppression microenvironment in advanced  
284 malignancies is particularly complex and strong. Therefore, insights from acute infection clearance  
285 could be particularly well suited for development of therapies against premalignant lesions that are  
286 usually removed surgically.

287 More focused applications could arise from studying HPV infections in sites other than the  
288 cervix, for instance in the case of respiratory recurrent papillomatosis. This is a rare condition caused  
289 by chronic infection by HPV6 or HPV11 that shares features of both acute and chronic infections.  
290 The chronic disease imposes a recurrent burden to the patients to control the acute, benign clinical  
291 presentations of the disease, which can progress fatally to the lungs [81]. Furthermore, given the  
292 unique microenvironments of non-cervical sites, studies of infection dynamics at these sites are greatly  
293 needed. In particular, anal intraepithelial neoplasias and anal squamous cell carcinomas are increasing  
294 in prevalence worldwide yet studies of HPV-immunity interactions in anal infections are few [82].

### 295 *Fertility*

296 The Zika epidemic has reminded us of the risk viral infections have on pregnancies [83].  
297 Anogenital infections by HPVs deserve to be studied in this context because rare deleterious effects  
298 could translate into an important burden, given their high prevalence. There is a well-established  
299 link between cervical disease and pregnancy complications [84], but we are only beginning to  
300 understand the connection between clinically asymptomatic HPV infections and complications  
301 such as pre-eclampsia, fetal growth restriction or pre-term delivery [85].

302 In men, anogenital asymptomatic infections by mucosal and cutaneous HPVs are very common  
303 [37] and some are associated with penile cancer [5]. Surprisingly, HPV DNA can also be found in  
304 human semen [86] and although this viral DNA could originate from desquamating epithelial cells,  
305 data suggest the presence of viral DNA directly associated to sperm cells [23]. Evidence supporting  
306 a correlation between infection by HPVs in men and infertility is still controversial [87] and the  
307 mechanisms involved remain largely unknown [88].

308 Finally, *in utero* transmission of HPVs is rare [89], but asymptomatic cervical viral infections can  
309 reduce barrier integrity [90] and viral DNA can be detected in the placenta [91]. There is further a  
310 sound body of evidence describing transmission of HPVs during vaginal birth, as illustrated by the  
311 case of infantile respiratory recurrent papillomatosis described above [81].

312 Overall, the presence of mucosal HPVs in placenta and semen suggests non-classical tropisms,  
313 and viral life cycle in these particular cellular environments needs to be elucidated. Clinical studies  
314 investigating acute anogenital infections in pregnant women (along the various stages of pregnancy) as  
315 well as in their partners are required to unravel how HPVs (independently of their oncogenic potential)  
316 may be either directly or indirectly increasing the risk of infertility, spontaneous abortions, pre-term  
317 labor, preeclampsia or other complications.

#### 318 *Vaccine escape*

319 Effective vaccines with high coverage rates exert major selective pressures on pathogens [92].  
320 The risk of an evolutionary response from the pathogen relies on its genetic diversity, and does not  
321 necessarily require *de novo* mutations if it is already diverse. Extant diversity in papillomaviruses is  
322 immense, with hundreds of viral lineages, which themselves harbour significant genetic variation [93].

323 While vaccines against HPVs are effective and safe, they may be leaving the door open for an  
324 evolutionary response [48]. This can occur if some vaccinated individuals are infected by HPV vaccine  
325 types (due to infection before vaccination, immunosuppression or failure to mount a sufficiently strong  
326 immune response). In the clinical trial for the nonavalent vaccine, even in the per-protocol efficacy  
327 population, where the  $n = 5812$  participants received all three doses of vaccine within one year and  
328 were HPV-uninfected at inclusion, the median number of infections by one of the targeted viruses  
329 was 3.6 for 1,000 person-years at risk (data from Table S5 in [94]). In the intention-to-treat population,  
330 which did not exclude 988 additional participants who received at least one vaccine dose, this number  
331 increased to 36. Despite the outstanding vaccine efficacy, when millions of women are vaccinated,  
332 this will still represent thousands of infections by vaccine-targeted viral genotypes that would be  
333 eventually cleared and not result in malignant disease. These acute infections would thus occur in  
334 vaccinated women, with a strong immune response, and the question arises whether they may last  
335 long enough to allow specific viral lineages (either pre-existing or *de novo* generated viral variants) to  
336 be differentially transmitted, thus paving the way for viral adaptation to this special environment.

337 HPV vaccines can generate off-target immune activity and offer protection against closely related  
338 viruses not targeted by the vaccine formulation [95,96]. Yet viral diversity remains so large that in the  
339 few regions where vaccination has reduced the prevalence of vaccine-targeted types, most other HPVs  
340 continue to circulate [6,97]. Overall, vaccination against HPVs will undoubtedly have a strong and  
341 highly desirable impact in disease prevention, but it will create novel host environments to which  
342 viruses may adapt.

343 Thanks to next generation sequencing, we now have access to an increasing number of full  
344 genomes. For instance, very recently, an analysis of more than 5500 HPV16 genomes identified shared  
345 feature between viruses isolated from precancers and cancers compared to viruses from case-control  
346 samples [98]. However, evaluating the potential for HPV evolution will require genomic data of  
347 intra- and inter-individual viral populations collected through time. Since HPVs are double-stranded  
348 DNA viruses replicated by host polymerases, mutation rates are expected to be low. Nevertheless, we  
349 know little about polymerase fidelity in somatic cells, both in general and during a viral infections.  
350 Investigation of long follow-up data sets with short sampling intervals are lacking, especially since  
351 evolutionary rates may exhibit periods of rapid increase followed by long periods of stasis, as  
352 demonstrated for Influenza A virus [99]. Further, in the case of HPVs, displaying acute, chronic  
353 and latent stages of the infection, the evolutionary dynamics may strongly depend on the presence  
354 of a latent phase and on the epidemiological transmission patterns, as described for Varicella-zoster  
355 virus [100]. For HPVs, focusing on the acute infections could therefore yield novel insights since this is  
356 where the viral life cycle is most productive.

#### 357 *Scars that matter long after clearance?*

358 Even when viral clearance does occur, recent work shows that acute infections can impair the  
359 immune system causing chronic inflammation or 'immunological scarring' [105]. Certain oncoviruses

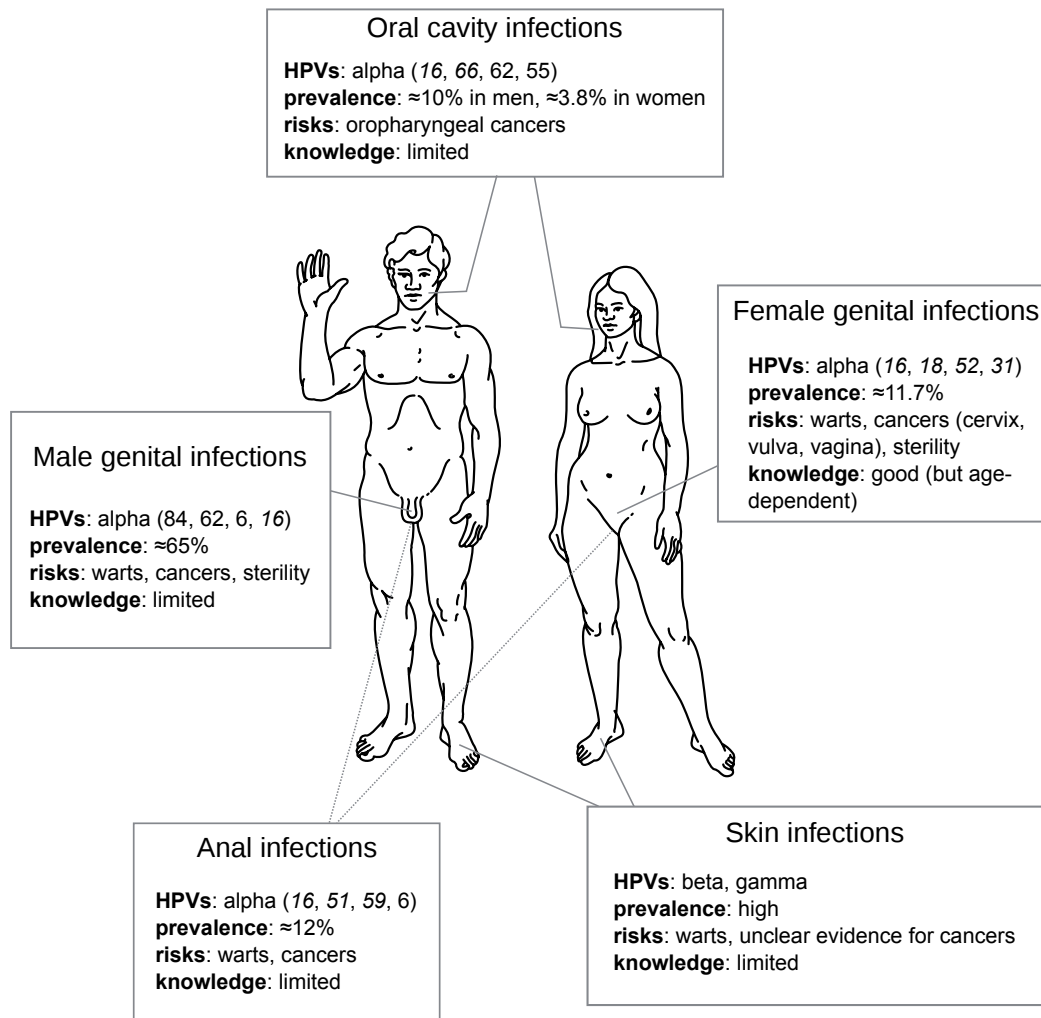

**Figure 5. Challenges of HPV acute infections per anatomical location.** For each location, HPVs are ordered per prevalence and oncogenic ones are in italic. Most prevalences are global estimates [1,4,101], except for oral (US [102]), genital in men (Brazil, Mexico, US, [103]) and anal (Brazil, Mexico, US [104]) sites. Detailed data are available in Supplementary Table.

360 are believed to leave behind molecular damage in their host cells, which can lead to cancer several  
361 years later [106]. Cervical cancers are a clear example of direct carcinogenesis, since chronic infection  
362 by oncogenic HPVs is a necessary cause for virtually all of these cancers. However, even acute  
363 infections can induce modifications in the cellular (epi)genome, creating the stage for pre-cancerous  
364 lesions [106,107]. Although an old hypothesis, the ‘hit-and-run’ effects of acute infections are poorly  
365 understood for bacterial or viral infections, and exploring how HPVs may cause this kind of damage  
366 remains an important research direction [108].

367 Speculatively, such a long-term impact could concern not only anogenital but also infections at  
368 cutaneous sites. Indeed, virtually all humans become infected by very diverse cutaneous HPVs, chiefly  
369 beta- and gammapapillomaviruses, which are proposed to act as cofactors for the risk of developing  
370 non-melanoma skin cancers in certain human populations [109]. Given that such HPVs infections are  
371 extremely prevalent (Figure 5), often causing subclinical infections and interact extensively with the  
372 immune system, they could be an ideal model for studying ‘under-the-radar’ viral infections and their  
373 potential side-effects on immune functioning.

## 374 Conclusions

375 Acute infections by HPVs are the rule rather than the exception, and a better understanding of  
376 such infections is urgent because of their enormous fundamental and public health implications. We  
377 propose that metapopulation and metacommunity approaches borrowed from ecology can provide  
378 a strong explanatory framework to the study of the course of HPV infections and better distinguish  
379 between acute, latent and chronic infections. In addition to the promise of identifying early markers  
380 of infection chronicity, understanding viral-immunity interactions can help design new treatments  
381 to boost natural immunity against novel infections. Such therapies may reduce the chances of an  
382 acute infection to chronify and to reach (pre)cancer stages. Detailed studies with long follow-up and  
383 short time intervals are further needed to precisely assess the role acute HPV infections could have on  
384 fertility or on the long-term ‘immune scars’ these infections may leave behind.

385 Finally, as with most infectious diseases, it is important to remain humble and to accept that  
386 elimination [110] of virulent HPVs is unlikely. In fact, it is not clear whether such selective removal  
387 should be desirable, as most HPVs are part of our virome and might be playing important ecological  
388 roles. This is why the development of vaccines should not stop us from improving our characterization  
389 of the natural history of HPVs and to shift from an elimination to control perspective.

### Box 1: Open questions about HPV acute infections

- Do some innate immunity evasion mechanisms lead to delayed clearance? [43]
- How common is immunological tolerance to HPVs?
- What role, if any, do natural B-cell responses play in clearance?
- Are there differences in immunological clearance mechanisms for different HPVs or for different infected cell types, tissue structures or anatomical sites?
- Are there long term effects after HPV infection clearance (immunological scarring)?
- How do HPV infections affect male and female fertility?
- How do HPV infection kinetics affect transmission? [111]
- Are HPVs infections structured in host tissues (the meta-population hypothesis)?
- What is the role of the microbiota in HPV infection clearance, persistence and progression to cancer? [112,113]

390 **Supplementary Materials:** The following are available online at [www.mdpi.com/link](http://www.mdpi.com/link), Table S1: HPV  
391 epidemiological data for Figure 5.

392 **Acknowledgments:** SA is supported by the European Research Council (ERC) under the European Union’s  
393 Horizon 2020 research and innovation program (EVOLPROOF, grant agreement No 648963). NB is supported  
394 by the European Research Council (ERC) under the European Union’s Horizon 2020 research and innovation  
395 program (CODOVIREVOL, grant agreement No 647916). All authors acknowledge further support from the  
396 CNRS and the IRD.

397 **Author Contributions:** All authors conceived and wrote the review.

398 **Conflicts of Interest:** The authors declare no conflict of interest. The funding sponsors had no role in the writing  
399 of the manuscript, and in the decision to publish it.

## 400 Abbreviations

401 The following abbreviations are used in this manuscript:

|     |      |                                    |
|-----|------|------------------------------------|
| 402 | CIN  | Cervical Intraepithelial Neoplasia |
|     | CTL  | Cytotoxic T Lymphocytes            |
|     | HPVs | Human Papillomaviruses             |
| 403 | HR   | High Risk                          |
|     | LR   | Low Risk                           |
|     | UN   | United Nations                     |

## 404 References

- 405 1. *IARC monographs on the evaluation of carcinogenic risks to humans ; v. 100B*; International Agency for Research  
406 on Cancer: Lyon, France, 2012.
- 407 2. Virgin, H.W.; Wherry, E.J.; Ahmed, R. Redefining chronic viral infection. *Cell* **2009**, *138*, 30–50.
- 408 3. Insinga, R.P.; Dasbach, E.J.; Elbasha, E.H.; Liaw, K.L.; Barr, E. Incidence and duration of cervical human  
409 papillomavirus 6, 11, 16, and 18 infections in young women: an evaluation from multiple analytic  
410 perspectives. *Cancer Epidemiol Biomarkers Prev* **2007**, *16*, 709–15.
- 411 4. Bruni, L.; Diaz, M.; Castellsagué, X.; Ferrer, E.; Bosch, F.X.; de Sanjosé, S. Cervical human papillomavirus  
412 prevalence in 5 continents: meta-analysis of 1 million women with normal cytological findings. *J Infect Dis*  
413 **2010**, *202*, 1789–99.
- 414 5. Plummer, M.; de Martel, C.; Vignat, J.; Ferlay, J.; Bray, F.; Franceschi, S. Global burden of cancers attributable  
415 to infections in 2012: a synthetic analysis. *Lancet Glob Health* **2016**, *4*, e609–e616.
- 416 6. Drolet, M.; Bénard, É.; Boily, M.C.; Ali, H.; Baandrup, L.; Bauer, H.; Beddows, S.; Brisson, J.; Brotherton,  
417 J.M.L.; Cummings, T.; Donovan, B.; Fairley, C.K.; Flagg, E.W.; Johnson, A.M.; Kahn, J.A.; Kavanagh,  
418 K.; Kjaer, S.K.; Kliewer, E.V.; Lemieux-Mellouki, P.; Markowitz, L.; Mboup, A.; Mesher, D.; Niccolai, L.;  
419 Oliphant, J.; Pollock, K.G.; Soldan, K.; Sonnenberg, P.; Tabrizi, S.N.; Tanton, C.; Brisson, M. Population-level  
420 impact and herd effects following human papillomavirus vaccination programmes: a systematic review  
421 and meta-analysis. *Lancet Infect Dis* **2015**, *15*, 565–80.
- 422 7. Herrero, R.; González, P.; Markowitz, L.E. Present status of human papillomavirus vaccine development  
423 and implementation. *Lancet Oncol* **2015**, *16*, e206–16.
- 424 8. Schiffman, M.; Solomon, D. Clinical practice. Cervical-cancer screening with human papillomavirus and  
425 cytologic cotesting. *N Engl J Med* **2013**, *369*, 2324–31.
- 426 9. Gakidou, E.; Nordhagen, S.; Obermeyer, Z. Coverage of Cervical Cancer Screening in 57 Countries: Low  
427 Average Levels and Large Inequalities. *PLoS Med* **2008**, *5*, e132.
- 428 10. Palència, L.; Espelt, A.; Rodríguez-Sanz, M.; Puigpinós, R.; Pons-Vigués, M.; Pasarín, M.I.; Spadea, T.;  
429 Kunst, A.E.; Borrell, C. Socio-economic inequalities in breast and cervical cancer screening practices in  
430 Europe: influence of the type of screening program. *Int J Epidemiol* **2010**, *39*, 757–765.
- 431 11. Bruni, L.; Diaz, M.; Barrionuevo-Rosas, L.; Herrero, R.; Bray, F.; Bosch, F.X.; de Sanjosé, S.; Castellsagué, X.  
432 Global estimates of human papillomavirus vaccination coverage by region and income level: a pooled  
433 analysis. *Lancet Glob Health* **2016**, *4*, e453–63.
- 434 12. Ronco, G.; Dillner, J.; Elfström, K.M.; Tunesi, S.; Snijders, P.J.F.; Arbyn, M.; Kitchener, H.; Segnan, N.;  
435 Gilham, C.; Giorgi-Rossi, P.; Berkhof, J.; Peto, J.; Meijer, C.J.L.M. Efficacy of HPV-based screening for  
436 prevention of invasive cervical cancer: follow-up of four European randomised controlled trials. *The Lancet*  
437 **2014**, *383*, 524–532.
- 438 13. Pettersson, B.F.; Hellman, K.; Vaziri, R.; Andersson, S.; Hellström, A.C. Cervical cancer in the screening era:  
439 who fell victim in spite of successful screening programs? *J Gynecol Oncol* **2011**, *22*, 76–82.
- 440 14. Castanon, A.; Landy, R.; Sasieni, P.D. Is cervical screening preventing adenocarcinoma and adenosquamous  
441 carcinoma of the cervix? *International Journal of Cancer* **2016**, *139*, 1040–1045.
- 442 15. Bertisch, B.; Franceschi, S.; Lise, M.; Vernazza, P.; Keiser, O.; Schöni-Affolter, F.; Bouchardy, C.; Dehler, S.;  
443 Levi, F.; Jundt, G.; Ess, S.; Pawlita, M.; Kovari, H.; Wandeler, G.; Calmy, A.; Cavassini, M.; Stöckle, M.;  
444 Clifford, G. Risk Factors for Anal Cancer in Persons Infected With HIV: A Nested Case-Control Study in  
445 the Swiss HIV Cohort Study. *American Journal of Epidemiology* **2013**, *178*, 877–884.
- 446 16. Gillison, M.L.; Chaturvedi, A.K.; Anderson, W.F.; Fakhry, C. Epidemiology of Human  
447 Papillomavirus-Positive Head and Neck Squamous Cell Carcinoma. *J Clin Oncol* **2015**, *33*, 3235–42.
- 448 17. Herse, F.; Reissell, E. The annual costs associated with human papillomavirus types 6, 11, 16, and 18  
449 infections in Finland. *Scand J Infect Dis* **2011**, *43*, 209–215.
- 450 18. Gravitt, P.E. The known unknowns of HPV natural history. *J Clin Invest* **2011**, *121*, 4593–4599.
- 451 19. Schiffman, M.; Wentzensen, N.; Wacholder, S.; Kinney, W.; Gage, J.C.; Castle, P.E. Human Papillomavirus  
452 Testing in the Prevention of Cervical Cancer. *J Natl Cancer Inst* **2011**, *103*, 368–383.
- 453 20. Hazard, K.; Karlsson, A.; Andersson, K.; Ekberg, H.; Dillner, J.; Forslund, O. Cutaneous Human  
454 Papillomaviruses Persist on Healthy Skin. *J Investigative Dermatology* **2007**, *127*, 116–119.

- 455 21. Depuydt, C.E.; Criel, A.M.; Benoy, I.H.; Arbyn, M.; Vereecken, A.J.; Bogers, J.J. Changes in type-specific  
456 human papillomavirus load predict progression to cervical cancer. *J Cell Mol Med* **2012**, *16*, 3096–104.
- 457 22. Houlihan, C.F.; Baisley, K.; Bravo, I.G.; Kapiga, S.; de Sanjosé, S.; Changalucha, J.; Ross, D.A.; Hayes, R.J.;  
458 Watson-Jones, D. Rapid acquisition of HPV around the time of sexual debut in adolescent girls in Tanzania.  
459 *Int J Epidemiol* **2016**, pp. 1–12.
- 460 23. Depuydt, C.E.; Jonckheere, J.; Berth, M.; Salembier, G.M.; Vereecken, A.J.; Bogers, J.J. Serial type-specific  
461 human papillomavirus (HPV) load measurement allows differentiation between regressing cervical lesions  
462 and serial virion productive transient infections. *Cancer Med* **2015**, *4*, 1294–1302.
- 463 24. Doorbar, J. Latent papillomavirus infections and their regulation. *Curr Opin Virol* **2013**, *3*, 416–21.
- 464 25. Maglennon, G.A.; McIntosh, P.B.; Doorbar, J. Immunosuppression Facilitates the Reactivation of Latent  
465 Papillomavirus Infections. *J Virol* **2014**, *88*, 710–716.
- 466 26. Doorbar, J.; Quint, W.; Banks, L.; Bravo, I.G.; Stoler, M.; Broker, T.R.; Stanley, M.a. The biology and life-cycle  
467 of human papillomaviruses. *Vaccine* **2012**, *30 Suppl 5*, F55–70.
- 468 27. Antonsson, A.; Karanfilovska, S.; Lindqvist, P.G.; Hansson, B.G. General Acquisition of Human  
469 Papillomavirus Infections of Skin Occurs in Early Infancy. *J Clin Microbiol* **2003**, *41*, 2509–2514.
- 470 28. Rintala, M.A.M.; Grénman, S.E.; Puranen, M.H.; Isolauri, E.; Ekblad, U.; Kero, P.O.; Syrjänen, S.M.  
471 Transmission of High-Risk Human Papillomavirus (HPV) between Parents and Infant: a Prospective Study  
472 of HPV in Families in Finland. *J Clin Microbiol* **2005**, *43*, 376–381.
- 473 29. Michael, K.M.; Waterboer, T.; Sehr, P.; Rother, A.; Reidel, U.; Boeing, H.; Bravo, I.G.; Schlehofer, J.; Gärtner,  
474 B.C.; Pawlita, M. Seroprevalence of 34 Human Papillomavirus Types in the German General Population.  
475 *PLoS Pathog* **2008**, *4*, e1000091.
- 476 30. Muñoz, N.; Méndez, F.; Posso, H.; Molano, M.; Brule, V.D.; C, A.J.; Ronderos, M.; Meijer, C.; Muñoz,  
477 A. Incidence, Duration, and Determinants of Cervical Human Papillomavirus Infection in a Cohort of  
478 Colombian Women with Normal Cytological Results. *J Infect Dis* **2004**, *190*, 2077–2087.
- 479 31. Castle, P.E.; Schiffman, M.; Herrero, R.; Hildesheim, A.; Rodriguez, A.C.; Bratti, M.C.; Sherman, M.E.;  
480 Wacholder, S.; Tarone, R.; Burk, R.D. A Prospective Study of Age Trends in Cervical Human Papillomavirus  
481 Acquisition and Persistence in Guanacaste, Costa Rica. *J Infect Dis* **2005**, *191*, 1808–1816.
- 482 32. Giuliano, A.R.; Lee, J.H.; Fulp, W.; Villa, L.L.; Lazcano, E.; Papenfuss, M.R.; Abrahamsen, M.; Salmeron, J.;  
483 Anic, G.M.; Rollison, D.E.; Smith, D. Incidence and clearance of genital human papillomavirus infection in  
484 men (HIM): a cohort study. *Lancet* **2011**, *377*, 932–940.
- 485 33. Sanjosé, S.d.; Diaz, M.; Castellsagué, X.; Clifford, G.; Bruni, L.; Muñoz, N.; Bosch, F.X. Worldwide  
486 prevalence and genotype distribution of cervical human papillomavirus DNA in women with normal  
487 cytology: a meta-analysis. *Lancet Infect Dis* **2007**, *7*, 453–459.
- 488 34. Guimerà, N.; Lloveras, B.; Lindeman, J.; Alemany, L.; Sandt, M.v.d.; Alejo, M.; Hernandez-suarez, G.; Bravo,  
489 I.G.; Molijn, A.; Jenkins, D.; Cubilla, A.; Muñoz, N.; Sanjose, S.d.; Bosch, F.X.; Quint, W. The Occasional  
490 Role of Low-risk Human Papillomaviruses 6, 11, 42, 44, and 70 in Anogenital Carcinoma Defined by  
491 Laser Capture Microdissection/pcr Methodology: Results From a Global Study. *Am J Surg Pathol* **2013**,  
492 *37*, 1299–1310.
- 493 35. Herrero, R.; Wacholder, S.; Rodríguez, A.C.; Solomon, D.; González, P.; Kreimer, A.R.; Porras, C.; Schussler,  
494 J.; Jiménez, S.; Sherman, M.E.; Quint, W.; Schiller, J.T.; Lowy, D.R.; Schiffman, M.; Hildesheim, A.; Costa  
495 Rica Vaccine Trial Group. Prevention of persistent human papillomavirus infection by an HPV16/18  
496 vaccine: a community-based randomized clinical trial in Guanacaste, Costa Rica. *Cancer Discov* **2011**,  
497 *1*, 408–19.
- 498 36. Castellsagué, X.; Naud, P.; Chow, S.N.; Wheeler, C.M.; Germar, M.J.V.; Lehtinen, M.; Paavonen, J.;  
499 Jaisamrarn, U.; Garland, S.M.; Salmerón, J.; Apter, D.; Kitchener, H.; Teixeira, J.C.; Skinner, S.R.; Limson, G.;  
500 Szarewski, A.; Romanowski, B.; Aoki, F.Y.; Schwarz, T.F.; Poppe, W.A.J.; Bosch, F.X.; de Carvalho, N.S.;  
501 Peters, K.; Tjalma, W.A.A.; Safaeian, M.; Raillard, A.; Descamps, D.; Struyf, F.; Dubin, G.; Rosillon, D.;  
502 Baril, L. Risk of newly detected infections and cervical abnormalities in women seropositive for naturally  
503 acquired human papillomavirus type 16/18 antibodies: analysis of the control arm of PATRICIA. *J Infect*  
504 *Dis* **2014**, *210*, 517–34.
- 505 37. Moreira, E.D.; Giuliano, A.R.; Palefsky, J.; Flores, C.A.; Goldstone, S.; Ferris, D.; Hillman, R.J.; Moi, H.;  
506 Stoler, M.H.; Marshall, B.; Vuocolo, S.; Guris, D.; Haupt, R.M. Incidence, Clearance, and Disease Progression  
507 of Genital Human Papillomavirus Infection in Heterosexual Men. *J Infect Dis* **2014**, *210*, 192–199.

- 508 38. Liu, S.H.; Cummings, D.A.T.; Zenilman, J.M.; Gravitt, P.E.; Brotman, R.M. Characterizing the Temporal  
509 Dynamics of Human Papillomavirus DNA Detectability Using Short-Interval Sampling. *Cancer Epidemiol*  
510 *Biomarkers Prev* **2014**, *23*, 200–208.
- 511 39. Shew, M.L.; Ermel, A.C.; Tong, Y.; Tu, W.; Qadadri, B.; Brown, D.R. Episodic detection of human  
512 papillomavirus within a longitudinal cohort of young women. *J Med Virol* **2015**, *87*, 2122–2129.
- 513 40. Ferenczy, A.; Franco, E. Persistent human papillomavirus infection and cervical neoplasia. *Lancet Oncol*  
514 **2002**, *3*, 11–6.
- 515 41. Stanley, M. Immunology of HPV Infection. *Curr Obstet Gynecol Rep* **2015**, *4*, 195–200.
- 516 42. Stanley, M. Immune responses to human papillomavirus. *Vaccine* **2006**, *24 Suppl 1*, S16–22.
- 517 43. Van Hede, D.; Langers, I.; Delvenne, P.; Jacobs, N. Origin and immunoescape of uterine cervical cancer.  
518 *Presse Med* **2014**, *43*, e413–e421.
- 519 44. Levins, R. Some Demographic and Genetic Consequences of Environmental Heterogeneity for Biological  
520 Control. *Bull Entomol Soc Am* **1969**, *15*, 237–240.
- 521 45. Hanski, I. *Metapopulation ecology*; Oxford University Press, 1999.
- 522 46. Frost, S.D.W.; Dumaurier, M.J.; Wain-Hobson, S.; Brown, A.J.L. Genetic drift and within-host  
523 metapopulation dynamics of HIV-1 infection. *Proc. Natl. Acad. Sci. USA* **2001**, *98*, 6975–6980.
- 524 47. Lythgoe, K.A.; Blanquart, F.; Pellis, L.; Fraser, C. Large Variations in HIV-1 Viral Load Explained by  
525 Shifting-Mosaic Metapopulation Dynamics. *PLoS Biol* **2016**, *14*, e1002567.
- 526 48. Murrall, C.L.; Bauch, C.T.; Day, T. Could the human papillomavirus vaccines drive virulence evolution?  
527 *Proc Biol Sci* **2015**, *282*, 20141069.
- 528 49. Ryser, M.D.; Myers, E.R.; Durrett, R. HPV clearance and the neglected role of stochasticity. *PLoS Comput*  
529 *Biol* **2015**, *11*, e1004113.
- 530 50. Moore, P.S.; Chang, Y. Why do viruses cause cancer? Highlights of the first century of human tumour  
531 virology. *Nat Rev Cancer* **2010**, *10*, 878–89.
- 532 51. Hanahan, D.; Weinberg, R.A. Hallmarks of cancer: the next generation. *Cell* **2011**, *144*, 646–74.
- 533 52. Smith, E.M.; Ritchie, J.M.; Yankowitz, J.; Wang, D.; Turek, L.P.; Haugen, T.H. HPV prevalence and  
534 concordance in the cervix and oral cavity of pregnant women. *Infect Dis Obstet Gynecol* **2004**, *12*, 45–56.
- 535 53. De Vuyst, H.; Chung, M.H.; Baussano, I.; Mugo, N.R.; Tenet, V.; van Kemenade, F.J.; Rana, F.S.; Sakr, S.R.;  
536 Meijer, C.J.; Snijders, P.J.; Franceschi, S. Comparison of HPV DNA testing in cervical exfoliated cells and  
537 tissue biopsies among HIV-positive women in Kenya. *Int J Cancer* **2013**, *133*, 1441–1446.
- 538 54. Nunes, E.M.; López, R.V.M.; Sudenga, S.L.; Gheit, T.; Tommasino, M.; Baggio, M.L.; Ferreira, S.; Galan, L.;  
539 Silva, R.C.; Lazcano-Ponce, E.; Giuliano, A.R.; Villa, L.L.; Sichero, L. Concordance of Beta-papillomavirus  
540 across anogenital and oral anatomic sites of men: The HIM Study. *Virology* **2017**, *510*, 55–59.
- 541 55. Hampras, S.S.; Rollison, D.E.; Giuliano, A.R.; McKay-Chopin, S.; Minoni, L.; Sereday, K.; Gheit, T.;  
542 Tommasino, M. Prevalence and Concordance of Cutaneous Beta Human Papillomavirus Infection at  
543 Mucosal and Cutaneous Sites. *J Infect Dis* **2017**, *216*, 92–96.
- 544 56. Hernandez, B.Y.; Shvetsov, Y.B.; Goodman, M.T.; Wilkens, L.R.; Thompson, P.J.; Zhu, X.; Tom, J.; Ning, L.  
545 Genital and extra-genital warts increase the risk of asymptomatic genital human papillomavirus infection  
546 in men. *Sex Transm Inf* **2011**, *87*, 391–395.
- 547 57. Kalantari, M.; Garcia-Carranca, A.; Morales-Vazquez, C.D.; Zuna, R.; Montiel, D.P.; Calleja-Macias,  
548 I.E.; Johansson, B.; Andersson, S.; Bernard, H.U. Laser capture microdissection of cervical human  
549 papillomavirus infections: Copy number of the virus in cancerous and normal tissue and heterogeneous  
550 DNA methylation. *Virology* **2009**, *390*, 261–267.
- 551 58. Quint, W.; Jenkins, D.; Molijn, A.; Struijk, L.; van de Sandt, M.; Doorbar, J.; Mols, J.; Van Hoof, C.; Hardt, K.;  
552 Struyf, F.; Colau, B. One virus, one lesion—individual components of CIN lesions contain a specific HPV  
553 type. *J Pathol* **2012**, *227*, 62–71.
- 554 59. Lechner, M.; Fenton, T.; West, J.; Wilson, G.; Feber, A.; Henderson, S.; Thirlwell, C.; Dibra, H.K.; Jay, A.;  
555 Butcher, L.; Chakravarthy, A.R.; Gratrix, F.; Patel, N.; Vaz, F.; O’Flynn, P.; Kalavrezos, N.; Teschendorff,  
556 A.E.; Boshoff, C.; Beck, S. Identification and functional validation of HPV-mediated hypermethylation in  
557 head and neck squamous cell carcinoma. *Genome Medicine* **2013**, *5*, 15.
- 558 60. Candi, E.; Schmidt, R.; Melino, G. The cornified envelope: a model of cell death in the skin. *Nat Rev Mol*  
559 *Cell Biol* **2005**, *6*, 328–340.

- 560 61. Eckhart, L.; Valle, L.D.; Jaeger, K.; Ballaun, C.; Szabo, S.; Nardi, A.; Buchberger, M.; Hermann, M.; Alibardi,  
561 L.; Tschachler, E. Identification of reptilian genes encoding hair keratin-like proteins suggests a new  
562 scenario for the evolutionary origin of hair. *Proc Natl Acad Sci USA* **2008**, *105*, 18419–18423.
- 563 62. Henry, J.; Toulza, E.; Hsu, C.Y.; Pellerin, L.; Balica, S.; Mazereeuw-Hautier, J.; Paul, C.; Serre, G.; Jonca, N.;  
564 Simon, M. Update on the epidermal differentiation complex. *Front Biosci* **2012**, *17*, 1517–1532.
- 565 63. Dhouailly, D. A new scenario for the evolutionary origin of hair, feather, and avian scales. *J Anat* **2009**,  
566 *214*, 587–606.
- 567 64. Gilliam, A.C.; Kremer, I.B.; Yoshida, Y.; Stevens, S.R.; Tootell, E.; Teunissen, M.B.; Hammerberg, C.; Cooper,  
568 K.D. The human hair follicle: a reservoir of CD40+ B7-deficient Langerhans cells that repopulate epidermis  
569 after UVB exposure. *J Invest Dermatol* **1998**, *110*, 422–427.
- 570 65. Malissen, B.; Tamoutounour, S.; Henri, S. The origins and functions of dendritic cells and macrophages in  
571 the skin. *Nat Rev Immunol* **2014**, *14*, 417–428.
- 572 66. Wilson, D.S. Complex Interactions in Metacommunities, with Implications for Biodiversity and Higher  
573 Levels of Selection. *Ecology* **1992**, *73*, 1984–2000.
- 574 67. Murall, C.L.; McCann, K.S.; Bauch, C.T. Food webs in the human body: linking ecological theory to viral  
575 dynamics. *PLoS One* **2012**, *7*, e48812.
- 576 68. Rynkiewicz, E.C.; Pedersen, A.B.; Fenton, A. An ecosystem approach to understanding and managing  
577 within-host parasite community dynamics. *Trends Parasitol* **2015**, *31*, 212–221.
- 578 69. Bravo, I.G.; Féllez-Sánchez, M. Papillomaviruses: Viral evolution, cancer and evolutionary medicine. *Evol*  
579 *Med Public Health* **2015**, *2015*, 32–51.
- 580 70. Egawa, N.; Egawa, K.; Griffin, H.; Doorbar, J. Human Papillomaviruses; Epithelial Tropisms, and the  
581 Development of Neoplasia. *Viruses* **2015**, *7*, 3863–3890.
- 582 71. Murray, R.F.; Hobbs, J.; Payne, B. Possible clonal origin of common warts (*Verruca vulgaris*). *Nature* **1971**,  
583 *232*, 51–52.
- 584 72. Herfs, M.; Yamamoto, Y.; Laury, A.; Wang, X.; Nucci, M.R.; McLaughlin-Drubin, M.E.; Münger, K.; Feldman,  
585 S.; McKeon, F.D.; Xian, W.; Crum, C.P. A discrete population of squamocolumnar junction cells implicated  
586 in the pathogenesis of cervical cancer. *Proc Natl Acad Sci USA* **2012**, *109*, 10516–21.
- 587 73. Nicolás-Párraga, S.; Gandini, C.; Pimenoff, V.N.; Alemany, L.; de Sanjosé, S.; Xavier Bosch, F.; Bravo, I.G.;  
588 the RIS HPV TT and HPV VVAP study groups. HPV16 variants distribution in invasive cancers of the  
589 cervix, vulva, vagina, penis, and anus. *Cancer Med* **2016**, *5*, 2909–2919.
- 590 74. Nicolás-Párraga, S.; Alemany, L.; de Sanjosé, S.; Bosch, F.; Bravo, I.; on behalf of the RIS HPV TT and HPV  
591 VVAP study groups. Differential HPV16 variant distribution in squamous cell carcinoma, adenocarcinoma  
592 and adenosquamous cell carcinoma. *Int J Cancer* **2017**, *140*, 2092–2100.
- 593 75. Maglennon, G.A.; McIntosh, P.; Doorbar, J. Persistence of viral DNA in the epithelial basal layer suggests a  
594 model for papillomavirus latency following immune regression. *Virology* **2011**, *414*, 153–163.
- 595 76. Reinson, T.; Henno, L.; Toots, M.; Jr, M.U.; Ustav, M. The Cell Cycle Timing of Human Papillomavirus  
596 DNA Replication. *PLoS ONE* **2015**, *10*, e0131675.
- 597 77. Bosch, F.X.; Robles, C.; Díaz, M.; Arbyn, M.; Baussano, I.; Clavel, C.; Ronco, G.; Dillner, J.; Lehtinen, M.;  
598 Petry, K.U.; Poljak, M.; Kjaer, S.K.; Meijer, C.J.L.M.; Garland, S.M.; Salmerón, J.; Castellsagué, X.; Bruni, L.;  
599 de Sanjosé, S.; Cuzick, J. HPV-FASTER: broadening the scope for prevention of HPV-related cancer. *Nat*  
600 *Rev Oncol* **2015**, *13*, 119–132.
- 601 78. Skeate, J.G.; Woodham, A.W.; Einstein, M.H.; Silva, D.M.D.; Kast, W.M. Current therapeutic vaccination  
602 and immunotherapy strategies for HPV-related diseases. *Hum Vaccin Immunother* **2016**, *12*, 1418–1429.
- 603 79. Trimble, C.L.; Morrow, M.P.; Kraynyak, K.A.; Shen, X.; Dallas, M.; Yan, J.; Edwards, L.; Parker, R.L.;  
604 Denny, L.; Giffear, M.; Brown, A.S.; Marcozzi-Pierce, K.; Shah, D.; Slager, A.M.; Sylvester, A.J.; Khan, A.;  
605 Broderick, K.E.; Juba, R.J.; Herring, T.A.; Boyer, J.; Lee, J.; Sardesai, N.Y.; Weiner, D.B.; Bagarazzi, M.L.  
606 Safety, efficacy, and immunogenicity of VGX-3100, a therapeutic synthetic DNA vaccine targeting human  
607 papillomavirus 16 and 18 E6 and E7 proteins for cervical intraepithelial neoplasia 2/3: a randomised,  
608 double-blind, placebo-controlled phase 2b trial. *Lancet* **2015**, *386*, 2078–2088.
- 609 80. Amador-Molina, A.; Hernández-Valencia, J.F.; Lamoyi, E.; Contreras-Paredes, A.; Lizano, M. Role of innate  
610 immunity against human papillomavirus (HPV) infections and effect of adjuvants in promoting specific  
611 immune response. *Viruses* **2013**, *5*, 2624–42.



- 612 81. Derkay, C.S.; Wiatrak, B. Recurrent Respiratory Papillomatosis: A Review. *Laryngoscope* **2008**,  
613 118, 1236–1247.
- 614 82. Martin, D.; Rödel, F.; Balermipas, P.; Rödel, C.; Fokas, E. The immune microenvironment and HPV  
615 in anal cancer: Rationale to complement chemoradiation with immunotherapy. *BBA Rev Cancer* **2017**,  
616 1868, 221–230.
- 617 83. Silasi, M.; Cardenas, I.; Kwon, J.Y.; Racicot, K.; Aldo, P.; Mor, G. Viral Infections During Pregnancy. *Am J*  
618 *Reprod Immunol* **2015**, 73, 199–213.
- 619 84. Kyrgiou, M.; Athanasiou, A.; Paraskevaidi, M.; Mitra, A.; Kalliala, I.; Martin-Hirsch, P.; Arbyn, M.; Bennett,  
620 P.; Paraskevaidis, E. Adverse obstetric outcomes after local treatment for cervical preinvasive and early  
621 invasive disease according to cone depth: systematic review and meta-analysis. *BMJ* **2016**, 354, i3633.
- 622 85. Zuo, Z.; Goel, S.; Carter, J.E. Association of Cervical Cytology and HPV DNA Status During Pregnancy  
623 With Placental Abnormalities and Preterm Birth. *Am J Clin Pathol* **2011**, 136, 260–265.
- 624 86. Laprise, C.; Trotter, H.; Monnier, P.; Coutlée, F.; Mayrand, M.H. Prevalence of human papillomaviruses in  
625 semen: a systematic review and meta-analysis. *Hum Reprod* **2014**, 29, 640–651.
- 626 87. Luttmmer, R.; Dijkstra, M.G.; Snijders, P.J.F.; Hompes, P.G.A.; Pronk, D.T.M.; Hubeek, I.; Berkhof, J.;  
627 Heideman, D.A.M.; Meijer, C.J.L.M. Presence of human papillomavirus in semen in relation to semen  
628 quality. *Hum Reprod* **2016**, 31, 280–286.
- 629 88. Foresta, C.; Noventa, M.; De Toni, L.; Gizzo, S.; Garolla, A. HPV-DNA sperm infection and infertility: from  
630 a systematic literature review to a possible clinical management proposal. *Andrology* **2015**, 3, 163–73.
- 631 89. Castellsagué, X.; Drudis, T.; Cañadas, M.P.; Goncé, A.; Ros, R.; Pérez, J.M.; Quintana, M.J.; Muñoz, J.;  
632 Albero, G.; de Sanjosé, S.; Bosch, F.X. Human Papillomavirus (HPV) infection in pregnant women and  
633 mother-to-child transmission of genital HPV genotypes: a prospective study in Spain. *BMC Infect Dis* **2009**,  
634 9, 74.
- 635 90. Racicot, K.; Cardenas, I.; Wünsche, V.; Aldo, P.; Guller, S.; Means, R.E.; Romero, R.; Mor, G. Viral Infection  
636 of the Pregnant Cervix Predisposes to Ascending Bacterial Infection. *J Immunol* **2013**, 191, 934–941.
- 637 91. Slatter, T.L.; Hung, N.G.; Clow, W.M.; Royds, J.A.; Devenish, C.J.; Hung, N.A. A clinicopathological  
638 study of episomal papillomavirus infection of the human placenta and pregnancy complications. *Modern*  
639 *Pathology* **2015**, 28, 1369–1382.
- 640 92. Gandon, S.; Day, T. Evidences of parasite evolution after vaccination. *Vaccine* **2008**, 26S, C4–7.
- 641 93. Bernard, H.U.; Burk, R.D.; Chen, Z.; van Doorslaer, K.; Hausen, H.z.; de Villiers, E.M. Classification of  
642 papillomaviruses (PVs) based on 189 PV types and proposal of taxonomic amendments. *Virology* **2010**,  
643 401, 70–79.
- 644 94. Joura, E.A.; Giuliano, A.R.; Iversen, O.E.; Bouchard, C.; Mao, C.; Mehlsen, J.; Moreira, Jr, E.D.; Ngan,  
645 Y.; Petersen, L.K.; Lazcano-Ponce, E.; Pitisuttithum, P.; Restrepo, J.A.; Stuart, G.; Woelber, L.; Yang, Y.C.;  
646 Cuzick, J.; Garland, S.M.; Huh, W.; Kjaer, S.K.; Bautista, O.M.; Chan, I.S.F.; Chen, J.; Gesser, R.; Moeller, E.;  
647 Ritter, M.; Vuocolo, S.; Luxembourg, A.; Broad Spectrum HPV Vaccine Study. A 9-valent HPV vaccine  
648 against infection and intraepithelial neoplasia in women. *N Engl J Med* **2015**, 372, 711–23.
- 649 95. Draper, E.; Bissett, S.L.; Howell-Jones, R.; Edwards, D.; Munslow, G.; Soldan, K.; Beddows, S. Neutralization  
650 of non-vaccine human papillomavirus pseudoviruses from the A7 and A9 species groups by bivalent HPV  
651 vaccine sera. *Vaccine* **2011**, 29, 8585–8590.
- 652 96. Kemp, T.J.; Hildesheim, A.; Safaeian, M.; Dauner, J.G.; Pan, Y.; Porras, C.; Schiller, J.T.; Lowy, D.R.;  
653 Herrero, R.; Pinto, L.A. HPV16/18 L1 VLP vaccine induces cross-neutralizing antibodies that may mediate  
654 cross-protection. *Vaccine* **2011**, 29, 2011–2014.
- 655 97. Markowitz, L.E.; Liu, G.; Hariri, S.; Steinau, M.; Dunne, E.F.; Unger, E.R. Prevalence of HPV After  
656 Introduction of the Vaccination Program in the United States. *Pediatrics* **2016**, 137, e20151968.
- 657 98. Mirabello, L.; Yeager, M.; Yu, K.; Clifford, G.M.; Xiao, Y.; Zhu, B.; Cullen, M.; Boland, J.F.; Wentzensen, N.;  
658 Nelson, C.W.; Raine-Bennett, T.; Chen, Z.; Bass, S.; Song, L.; Yang, Q.; Steinberg, M.; Burdett, L.; Dean, M.;  
659 Roberson, D.; Mitchell, J.; Lorey, T.; Franceschi, S.; Castle, P.E.; Walker, J.; Zuna, R.; Kreimer, A.R.; Beachler,  
660 D.C.; Hildesheim, A.; Gonzalez, P.; Porras, C.; Burk, R.D.; Schiffman, M. HPV16 E7 Genetic Conservation  
661 Is Critical to Carcinogenesis. *Cell* **2017**, 170, 1164–1174.e6.
- 662 99. Worobey, M.; Han, G.Z.; Rambaut, A. A synchronized global sweep of the internal genes of modern avian  
663 influenza virus. *Nature* **2014**, 508, 254–7.

- 664 100. Weinert, L.A.; Depledge, D.P.; Kundu, S.; Gershon, A.A.; Nichols, R.A.; Balloux, F.; Welch, J.J.; Breuer,  
665 J. Rates of Vaccine Evolution Show Strong Effects of Latency: Implications for Varicella Zoster Virus  
666 Epidemiology. *Mol Biol Evol* **2015**, *32*, 1020–1028.
- 667 101. Bzhalava, D.; Johansson, H.; Ekström, J.; Faust, H.; Möller, B.; Eklund, C.; Nordin, P.; Stenquist, B.; Paoli, J.;  
668 Persson, B.; Forslund, O.; Dillner, J. Unbiased Approach for Virus Detection in Skin Lesions. *PLoS ONE*  
669 **2013**, *8*, e65953.
- 670 102. Gillison, M.L.; Broutian, T.; Pickard, R.K.L.; Tong, Z.y.; Xiao, W.; Kahle, L.; Graubard, B.I.; Chaturvedi, A.K.  
671 Prevalence of Oral HPV Infection in the United States, 2009–2010. *JAMA* **2012**, *307*, 693–703.
- 672 103. Giuliano, A.R.; Lazcano-Ponce, E.; Villa, L.L.; Flores, R.; Salmeron, J.; Lee, J.H.; Papenfuss, M.R.;  
673 Abrahamsen, M.; Jolles, E.; Nielson, C.M.; Baggio, M.L.; Silva, R.; Quiterio, M. The Human Papillomavirus  
674 Infection in Men Study: Human Papillomavirus Prevalence and Type Distribution among Men Residing in  
675 Brazil, Mexico, and the United States. *Cancer Epidemiol Biomarkers Prev* **2008**, *17*, 2036–2043.
- 676 104. Nyitray, A.G.; Smith, D.; Villa, L.; Lazcano-Ponce, E.; Abrahamsen, M.; Papenfuss, M.; Giuliano, A.R.  
677 Prevalence of and Risk Factors for Anal Human Papillomavirus Infection in Men Who Have Sex with  
678 Women: A Cross-National Study. *J Infect Dis* **2010**, *201*, 1498–1508.
- 679 105. da Fonseca, D.M.; Hand, T.W.; Han, S.J.; Gerner, M.Y.; Glatman Zaretsky, A.; Byrd, A.L.; Harrison, O.J.;  
680 Ortiz, A.M.; Quinones, M.; Trinchieri, G.; Brenchley, J.M.; Brodsky, I.E.; Germain, R.N.; Randolph, G.J.;  
681 Belkaid, Y. Microbiota-Dependent Sequelae of Acute Infection Compromise Tissue-Specific Immunity. *Cell*  
682 **2015**, *163*, 354–66.
- 683 106. Paschos, K.; Allday, M.J. Epigenetic reprogramming of host genes in viral and microbial pathogenesis.  
684 *Trends Microbiol* **2010**, *18*, 439–47.
- 685 107. Hattori, N.; Ushijima, T. Epigenetic impact of infection on carcinogenesis: mechanisms and applications.  
686 *Genome Medicine* **2016**, *8*, 10.
- 687 108. Johannsen, E.; Lambert, P.F. Epigenetics of human papillomaviruses. *Virology* **2013**, *445*, 205–212.
- 688 109. Quint, K.D.; Genders, R.E.; de Koning, M.N.; Borgogna, C.; Gariglio, M.; Bouwes Bavinck, J.N.; Doorbar,  
689 J.; Feltkamp, M.C. Human Beta-papillomavirus infection and keratinocyte carcinomas. *J Pathol* **2015**,  
690 *235*, 342–354.
- 691 110. Brisson, M.; Bénard, E.; Drolet, M.; Bogaards, J.A.; Baussano, I.; Vänskä, S.; Jit, M.; Boily, M.C.; Smith, M.A.;  
692 Berkhof, J.; Canfell, K.; Chesson, H.W.; Burger, E.A.; Choi, Y.H.; De Blasio, B.F.; De Vlas, S.J.; Guzzetta, G.;  
693 Hontelez, J.A.C.; Horn, J.; Jepsen, M.R.; Kim, J.J.; Lazzarato, F.; Matthijsse, S.M.; Mikolajczyk, R.; Paveleyev,  
694 A.; Pillsbury, M.; Shafer, L.A.; Tully, S.P.; Turner, H.C.; Usher, C.; Walsh, C. Population-level impact, herd  
695 immunity, and elimination after human papillomavirus vaccination: a systematic review and meta-analysis  
696 of predictions from transmission-dynamic models. *Lancet Public Health* **2016**, *1*, e8–e17.
- 697 111. Grabowski, M.K.; Kong, X.; Gray, R.H.; Serwadda, D.; Kigozi, G.; Gravitt, P.E.; Nalugoda, F.; Reynolds, S.J.;  
698 Wawer, M.J.; Redd, A.D.; Watya, S.; Quinn, T.C.; Tobian, A.A.R. Partner Human Papillomavirus Viral Load  
699 and Incident Human Papillomavirus Detection in Heterosexual Couples. *J Infect Dis* **2016**, *213*, 948–56.
- 700 112. Brotman, R.M.; Shardell, M.D.; Gajer, P.; Tracy, J.K.; Zenilman, J.M.; Ravel, J.; Gravitt, P.E. Interplay between  
701 the temporal dynamics of the vaginal microbiota and human papillomavirus detection. *J Infect Dis* **2014**,  
702 *210*, 1723–33.
- 703 113. Mitra, A.; MacIntyre, D.A.; Marchesi, J.R.; Lee, Y.S.; Bennett, P.R.; Kyrgiou, M. The vaginal microbiota,  
704 human papillomavirus infection and cervical intraepithelial neoplasia: what do we know and where are  
705 we going next? *Microbiome* **2016**, *4*, 58.
